# Supplementary material
Source: Springer Nature journal article supplement (https://www.springermedizin.de/resource/supplementary/12885_2012_3801_MOESM1_ESM.pdf/9464526)

**A****OSCC biopsies**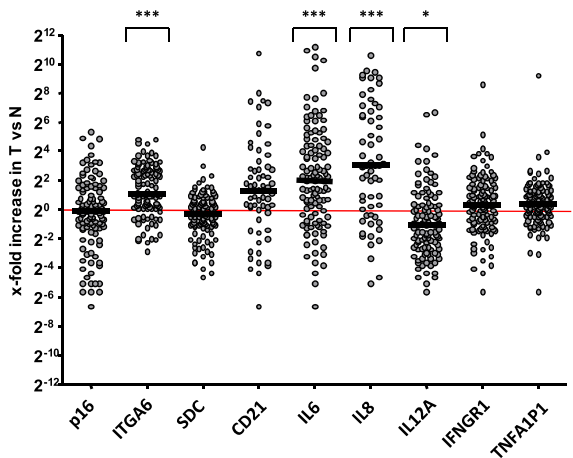**B**

|         | HPV neg | HPV pos | total    |
|---------|---------|---------|----------|
| EBV neg | 80      | 4       | 84       |
| EBV pos | 24      | 6       | 30 (26%) |
| total   | 104     | 10 (9%) | 114      |

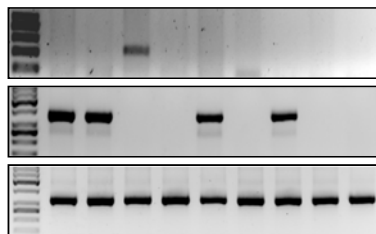**C****HPV infection**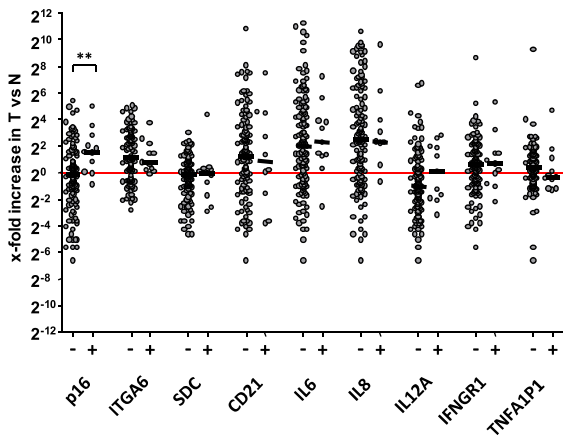

Supplement: MOESM1 [file 9464526]
